# Supplementary material for: Cathepsin K promotes the proliferation of hepatocellular carcinoma cells through induction of SIAH1 ubiquitination and degradation
Source: PubMed Central journal article supplement — iScience. 2023 May 9;26(6):106852. doi: 10.1016/j.isci.2023.106852 (PMC10209540; doi:10.1016/j.isci.2023.106852), 2023-05-09
Supplement: mmc1.pdf [file mmc1.pdf]

**Supplemental information**

**Cathepsin K promotes the proliferation of  
hepatocellular carcinoma cells through induction  
of SIAH1 ubiquitination and degradation**

**Chengming Zhang, Zhiyi Liu, Xiaotian Wang, Bin Zhang, Licheng Cui, Qinghe Hu, Bin Hu, Kuan Cao, Wengang Shan, Hengliang Shi, and Renhao Wang**

**Table S1. List of information on human studies. Related to STAR Methods.**

| <b>Information on human studies</b> | <b>SOURCE</b>                                        | <b>IDENTIFIER</b> |
|-------------------------------------|------------------------------------------------------|-------------------|
| Male, 38, Hemangioma                | The Affiliated Hospital of Xuzhou Medical University | N/A               |
| Male, 42, Hepatic trauma            | The Affiliated Hospital of Xuzhou Medical University | N/A               |
| Female, 45, Hemangioma              | The Affiliated Hospital of Xuzhou Medical University | N/A               |
| Male, 52, Hepatic trauma            | The Affiliated Hospital of Xuzhou Medical University | N/A               |
| Male, 32, Hepatic trauma            | The Affiliated Hospital of Xuzhou Medical University | N/A               |
| Female, 44, Hemangioma              | The Affiliated Hospital of Xuzhou Medical University | N/A               |
| Male, 61, Hepatic trauma            | The Affiliated Hospital of Xuzhou Medical University | N/A               |
| Female, 55, Hemangioma              | The Affiliated Hospital of Xuzhou Medical University | N/A               |
| Male, 52, Hemangioma                | The Affiliated Hospital of Xuzhou Medical University | N/A               |
| Male, 38, Hepatic trauma            | The Affiliated Hospital of Xuzhou Medical University | N/A               |
| Male, 47, Hemangioma                | The Affiliated Hospital of Xuzhou Medical University | N/A               |
| Female, 42, Hepatic trauma          | The Affiliated Hospital of Xuzhou Medical University | N/A               |
| Male, 59, Hepatic trauma            | The Affiliated Hospital of Xuzhou Medical University | N/A               |
| Male, 46, Hepatic trauma            | The Affiliated Hospital of Xuzhou Medical University | N/A               |
| Male, 56, HCC                       | The Affiliated Hospital of Xuzhou Medical University | N/A               |
| Male, 49, HCC                       | The Affiliated Hospital of Xuzhou Medical University | N/A               |
| Female, 53, HCC                     | The Affiliated Hospital of Xuzhou Medical University | N/A               |
| Male, 46, HCC                       | The Affiliated Hospital of Xuzhou Medical University | N/A               |
| Male, 36, HCC                       | The Affiliated Hospital of Xuzhou Medical University | N/A               |
| Male, 52, HCC                       | The Affiliated Hospital of Xuzhou Medical University | N/A               |
| Female, 60, HCC                     | The Affiliated Hospital of Xuzhou Medical University | N/A               |
| Male, 39, HCC                       | The Affiliated Hospital of Xuzhou Medical University | N/A               |
| Male, 62, HCC                       | The Affiliated Hospital of Xuzhou Medical University | N/A               |
| Male, 58, HCC                       | The Affiliated Hospital of Xuzhou Medical University | N/A               |
| Male, 55, HCC                       | The Affiliated Hospital of Xuzhou Medical University | N/A               |
| Male, 48, HCC                       | The Affiliated Hospital of Xuzhou Medical University | N/A               |
| Male, 63, HCC                       | The Affiliated Hospital of Xuzhou Medical University | N/A               |
| Female, 51, HCC                     | The Affiliated Hospital of Xuzhou Medical University | N/A               |

There is no influence of age, developmental stage and sex on the study.

**Figure S1. Knock down of CTSK inhibits the proliferation of HCC cells. Related to Figure 3.**

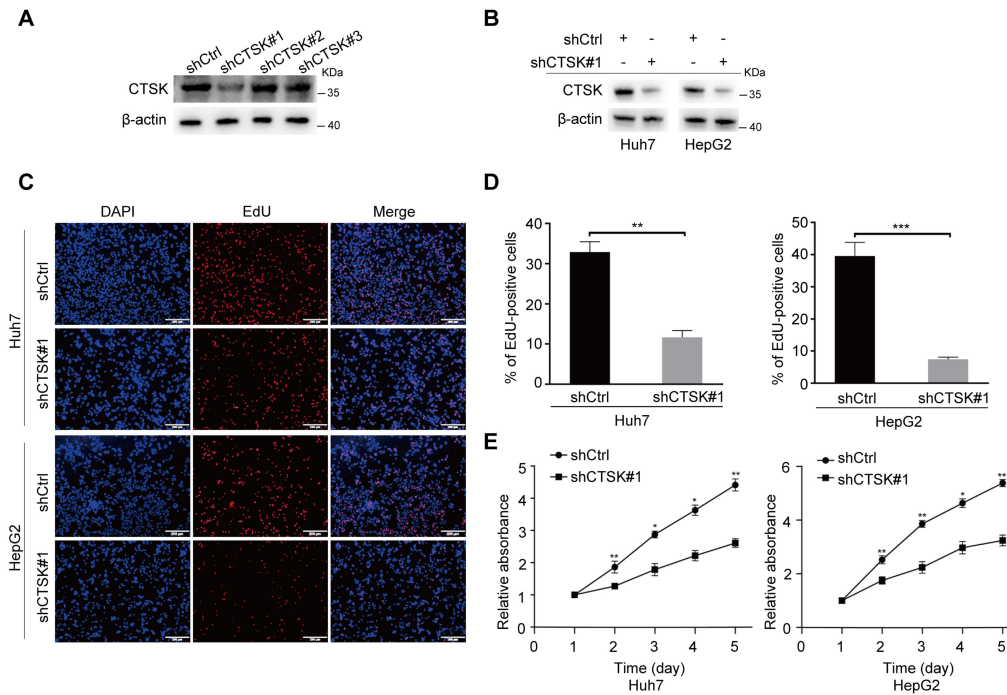

A: Western blotting showed the silencing efficiency of CTSK protein level; B: Western blotting revealed the silencing efficiency of shCTSK#1 on CTSK protein level in Huh7 and HepG2 cells; C: Representative images of the EdU experiment. Scale bar: 200  $\mu$ m; D: Statistical analysis of EdU experiments performed in Huh7 and HepG2 cells after knock down of CTSK; E: Results of the CCK-8 assay. All quantitative data are means  $\pm$  s.e.m. from three independent experiments (n = 3). The value of first day in CCK-8 assay was labeled "1". \* $P$  < 0.05, \*\* $P$  < 0.01, as evaluated by paired two-tailed Student's  $t$  test.
